# Supplementary material for: Detection of Typical Forest Degradation Patterns: Characteristics and Drivers of Forest Degradation in Northeast China
Source: MDPI journal article supplement (doi:10.3390/rs16081389), 2024-04-14
Supplement: s1 [file s1]

Supplementary Materials: **Table S1.** Field survey data

| Latitude | Longitude | Degradation types | Leaf area index |
|----------|-----------|-------------------|-----------------|
| 36.823   | 112.209   | fire              | 0               |
| 49.518   | 123.023   | fire              | 0               |
| 49.534   | 123.169   | fire              | 0               |
| 49.927   | 120.830   | fire              | 0               |
| 53.006   | 122.518   | fire              | 0               |
| 50.567   | 123.580   | fire              | 0               |
| 50.990   | 122.431   | fire              | 0               |
| 34.356   | 109.233   | fire              | 0               |
| 52.871   | 123.164   | fire              | 0               |
| 52.874   | 123.144   | fire              | 0               |
| 48.209   | 119.986   | fire              | 0               |
| 50.905   | 124.393   | fire              | 0               |
| 48.172   | 119.800   | fire              | 0               |
| 51.248   | 124.798   | fire              | 0               |
| 48.176   | 119.882   | fire              | 0               |
| 48.221   | 119.961   | fire              | 0               |
| 48.777   | 120.969   | fire              | 0               |
| 51.584   | 122.369   | fire              | 0               |
| 51.624   | 124.251   | fire              | 0               |
| 53.003   | 122.680   | fire              | 0               |
| 33.146   | 105.297   | Drought&Insect    | 2.81            |
| 33.778   | 105.760   | Drought           | 2.25            |
| 38.064   | 110.450   | Drought           | 0.62            |
| 39.543   | 110.573   | Drought           | 1.12            |
| 40.860   | 110.584   | Drought           | 1.22            |
| 41.592   | 120.556   | Drought           | 1.51            |
| 43.797   | 117.884   | Drought           | 1.66            |
| 44.513   | 120.327   | Drought&Insect    | 1.22            |
| 47.803   | 119.585   | Drought           | 3.34            |
| 50.509   | 120.137   | Drought&Insect    | 2.12            |
| 50.730   | 120.308   | Drought&Insect    | 2.5             |
| 51.962   | 121.796   | Drought&Insect    | 2.26            |
| 51.971   | 121.769   | Drought&Insect    | 2.26            |
| 34.033   | 107.316   | Insect            | 2.24            |
| 34.312   | 106.200   | Insect            | 2.31            |
| 42.118   | 119.181   | Insect            | 0.95            |
| 42.895   | 118.856   | Insect            | 0.85            |
| 44.296   | 119.583   | Insect            | 1.8             |
| 46.325   | 120.580   | Insect            | 1.32            |
| 46.929   | 120.824   | Insect            | 1.89            |
| 42.906   | 125.639   | Insect            | 1.42            |
